# Supplementary material for: Digitalized analyses of intraoperative acetabular component position using image-matching technique in total hip arthroplasty
Source: PubMed Central journal article supplement — Bone Joint Res. 2020 Jul 23;9(7):360–7. doi: 10.1302/2046-3758.97.BJR-2019-0260.R2 (PMC7376306; doi:10.1302/2046-3758.97.bjr-2019-0260.r2), 2020-07-23
Supplement: BJR-9-360-s0001.pdf [file BJR-9-360-s0001.pdf]

The posture matrices of the pelvic and cup coordinate systems relative to the world coordinate system were obtained from JointTrack (University of Florida, Gainesville, Florida, USA) ( $R_p$  and  $R_c$ ).

$$R_p = \begin{bmatrix} \alpha_1 & \alpha_2 & \alpha_3 \\ \beta_1 & \beta_2 & \beta_3 \\ \gamma_1 & \gamma_2 & \gamma_3 \end{bmatrix}, R_c = \begin{bmatrix} \lambda_1 & \lambda_2 & \lambda_3 \\ \mu_1 & \mu_2 & \mu_3 \\ \nu_1 & \nu_2 & \nu_3 \end{bmatrix}$$

The posture matrix of the cup coordinate systems relative to the pelvic coordinate system ( $R_{c2}$ ) was calculated as follows:

$$R_{c2} = R_p^T R_c = \begin{bmatrix} \lambda'_1 & \lambda'_2 & \lambda'_3 \\ \mu'_1 & \mu'_2 & \mu'_3 \\ \nu'_1 & \nu'_2 & \nu'_3 \end{bmatrix}$$

The normal vector of the cup opening plane was calculated as:

$$(\mu'_2 \nu'_3 - \nu'_2 \mu'_3 \quad \nu'_2 \lambda'_3 - \lambda'_2 \nu'_3 \quad \lambda'_2 \mu'_3 - \mu'_2 \lambda'_3)$$

Therefore, the radiological anteversion angle (RA) and radiological inclination angle (RI) were calculated from these expressions.

$$\cos \theta_{RA} = \frac{|\lambda'_2 \mu'_3 - \mu'_2 \lambda'_3|}{\sqrt{(\nu'_2 \lambda'_3 - \lambda'_2 \nu'_3)^2 + (\lambda'_2 \mu'_3 - \mu'_2 \lambda'_3)^2}}$$

$$\sin \theta_{RI} = \frac{|\mu'_2 \nu'_3 - \nu'_2 \mu'_3|}{\sqrt{(\mu'_2 \nu'_3 - \nu'_2 \mu'_3)^2 + (\nu'_2 \lambda'_3 - \lambda'_2 \nu'_3)^2}}$$
